# Supplementary material
Source: Springer Nature journal article supplement (https://www.springermedizin.de/resource/supplementary/12889_2011_3184_MOESM7_ESM.pdf/9488330)

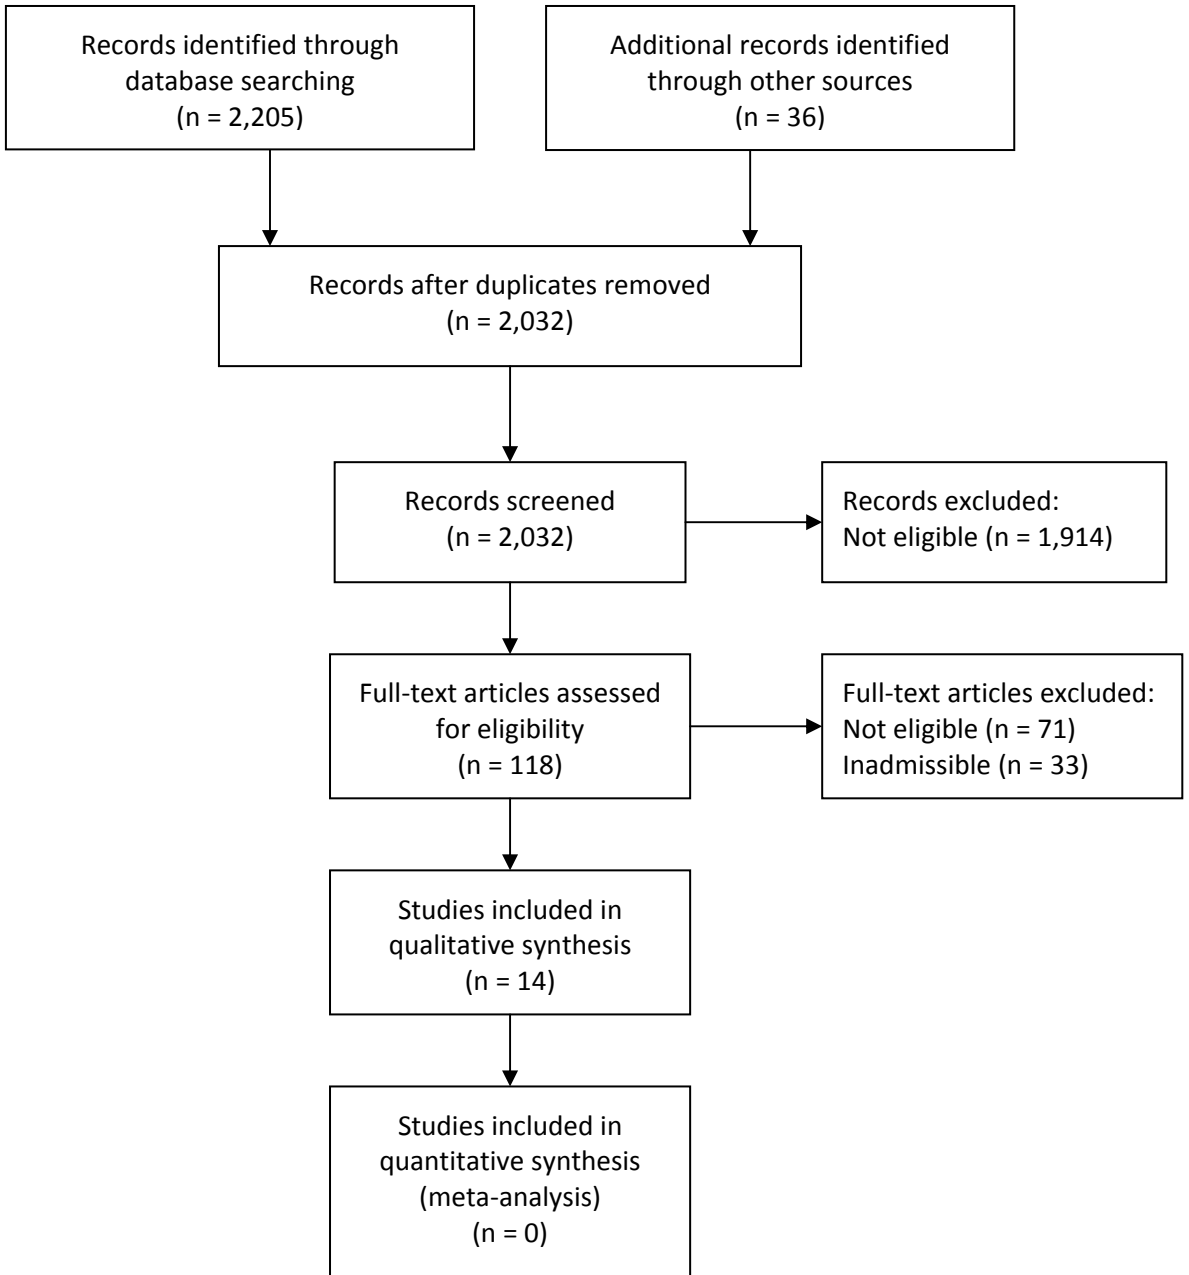

Supplement: MOESM7 [file 9488330]
